# Supplementary material for: Comparative Nectary Morphology across Cleomaceae (Brassicales)
Source: MDPI journal article supplement (doi:10.3390/plants12061263), 2023-03-10
Supplement: s1 [file s1]

**Table S1.** Accession numbers for the nine Cleomaceae species voucher specimens. All voucher specimens were collected by B.Z. or B.Z. and S.W. and deposited in the University of Alberta Vascular Plant Herbarium (ALTA).

| Species                      | ALTA Accession Number |
|------------------------------|-----------------------|
| <i>Arivela viscosa</i>       | 143371                |
| <i>Cleome amblyocarpa</i>    | 144822                |
| <i>Cleome violacea</i>       | 144828                |
| <i>Gynandropsis gynandra</i> | 143369                |
| <i>Melidiscus giganteus</i>  | 144833                |
| <i>Polanisia dodecandra</i>  | 144836                |
| <i>Sieruela hirta</i>        | 143370                |
| <i>Sieruela rutidosperma</i> | 144838                |
| <i>Tarenaya houtteana</i>    | 144840                |
