# Supplementary material for: Comparative Nectary Morphology across Cleomaceae (Brassicales)
Source: MDPI journal article supplement (doi:10.3390/plants12061263), 2023-03-10
Supplement: s1 [file s1]

**Table S2.** Brief descriptions of the flowers at the three developmental stages for the nine Cleomaceae species.

| Species                      | Stage        | Description                                                                                                                       |
|------------------------------|--------------|-----------------------------------------------------------------------------------------------------------------------------------|
| <i>Arivela viscosa</i>       | Bud          | Sepals closed with petals inserted; 0.4–0.6 cm from base of sepals to apex of sepals                                              |
|                              | Intermediate | Sepals closed with petals exerted; 0.7–0.9 cm from base of sepals to apex of petals                                               |
|                              | Anthesis     | Anthesis; sepals and petals open, anthers dehiscent                                                                               |
| <i>Cleome amblyocarpa</i>    | Bud          | Sepals closed with petals inserted; 0.2 cm from base of sepals to apex of sepals                                                  |
|                              | Intermediate | Sepals closed with petals exerted; 0.5–0.6 cm from base of sepals to apex of petals                                               |
|                              | Anthesis     | Anthesis; sepals and petals open, anthers dehiscent                                                                               |
| <i>Cleome violacea</i>       | Bud          | Sepals closed with petals exerted; 0.1–0.4 cm in length from base of sepals to apex of petals                                     |
|                              | Intermediate | Petals beginning to open                                                                                                          |
|                              | Anthesis     | Anthesis; sepals and petals open, anthers dehiscent                                                                               |
| <i>Gynandropsis gynandra</i> | Bud          | Sepals closed with petals inserted, apex of pistil level with sepals or exerted; 0.5–0.7 cm from base of sepals to apex of pistil |
|                              | Intermediate | Sepals closed with petals exerted, pistil elevated above petals; 1.5–1.9 cm from base of sepals to apex of pistil                 |
|                              | Anthesis     | Anthesis; sepals and petals open, anthers dehiscent                                                                               |
| <i>Melidiscus giganteus</i>  | Bud          | Sepals closed with abaxial sepal apex extending beyond closed petals; 1.5–2.5 cm from base of sepals to apex of petals            |
|                              | Intermediate | Sepals open, filaments and gynophore exerted and incurved with anthers and pistil enclosed in petals                              |
|                              | Anthesis     | Anthesis; sepals and petals open, anthers and pistil released from petals                                                         |
| <i>Polanisia dodecandra</i>  | Bud          | Sepals closed with petals inserted, beak of pistil exerted; 0.5–0.7 cm from base of sepals to apex of pistil                      |
|                              | Intermediate | Sepals and petals opening, filaments not fully elongated; 1.0–1.2 cm from base of sepals to apex of pistil                        |
|                              | Anthesis     | Anthesis; sepals and petals open, anthers dehiscent                                                                               |
| <i>Sieruela hirta</i>        | Bud          | Sepals closed with petals inserted; 0.4–0.9 cm from base of sepals to apex of sepals                                              |
|                              | Intermediate | Sepals closed with petals exerted; 1.0–1.5 cm from base of sepals to apex of petals                                               |
|                              | Flower       | Anthesis; sepals and petals open, anthers dehiscent                                                                               |
| <i>Sieruela rutidosperma</i> | Bud          | Sepals closed with petals exerted; 0.3–0.5 cm from base of sepals to apex of petals                                               |
|                              | Intermediate | Sepals closed with petals exerted; 0.6–0.7 cm from base of sepals to apex of petals                                               |
|                              | Anthesis     | Anthesis; sepals and petals open, anthers dehiscent                                                                               |
| <i>Tarenaya houtteana</i>    | Bud          | Sepals closed with petals exerted; 0.7–1.9 cm from base of sepals to apex of petals                                               |
|                              | Intermediate | Sepals open, filaments and gynophore exerted and incurved with anthers and pistil enclosed in petals                              |
|                              | Anthesis     | Anthesis; sepals and petals open, anthers and pistil released from petals                                                         |

Note: Descriptions include key distinguishing features for each stage. As the floral nectaries are obscured early in development for all species and at anthesis for some species, nectary characteristics were excluded from the descriptions.
